# Supplementary material for: A trial of pirfenidone in hospitalized adult patients with severe coronavirus disease 2019
Source: PubMed Central journal article supplement — Chin Med J (Engl). 2021 Dec 1;135(3):368–70. doi: 10.1097/CM9.0000000000001614 (PMC8812696; doi:10.1097/cm9.0000000000001614), 2021-12-01

**A**

**Pirfenidone**

|                           |          | No. of Patients in Oxygen-Support Group at Baseline(%) |                         |                             |                        |
|---------------------------|----------|--------------------------------------------------------|-------------------------|-----------------------------|------------------------|
|                           |          | Invasive<br>(N = 3)                                    | Noninvasive<br>(N = 21) | Low-flow oxygen<br>(N = 47) | Ambient air<br>(N = 2) |
| Category on ordinal scale | →        | <b>5</b>                                               | <b>4</b>                | <b>3</b>                    | <b>2</b>               |
| Death                     | <b>6</b> | 0                                                      | 0                       | 0                           | 0                      |
| Invasive                  | <b>5</b> | 1(33.3)                                                | 0                       | 0                           | 0                      |
| Noninvasive               | <b>4</b> | 0                                                      | 0                       | 0                           | 0                      |
| Low-flow oxygen           | <b>3</b> | 2(66.7)                                                | 5(23.8)                 | 3(6.4)                      | 0                      |
| Ambient air               | <b>2</b> | 0                                                      | 3(14.3)                 | 6(12.8)                     | 0                      |
| Discharged                | <b>1</b> | 0                                                      | 13(61.9)                | 38(80.9)                    | 2(100.0)               |
| <b>Improvement</b>        |          | <b>2(66.7)</b>                                         | <b>16(76.2)</b>         | <b>38(80.9)</b>             | <b>2(100.0)</b>        |

↑  
Category on ordinal scale

**B**

**Non-Pirfenidone**

|                           |          | No. of Patients in Oxygen-Support Group at Baseline(%) |                         |                             |                        |
|---------------------------|----------|--------------------------------------------------------|-------------------------|-----------------------------|------------------------|
|                           |          | Invasive<br>(N = 3)                                    | Noninvasive<br>(N = 19) | Low-flow oxygen<br>(N = 48) | Ambient air<br>(N = 3) |
| Category on ordinal scale | →        | <b>5</b>                                               | <b>4</b>                | <b>3</b>                    | <b>2</b>               |
| Death                     | <b>6</b> | 0                                                      | 2(10.5)                 | 0                           | 0                      |
| Invasive                  | <b>5</b> | 0                                                      | 3(15.8)                 | 0                           | 0                      |
| Noninvasive               | <b>4</b> | 1(33.3)                                                | 3(15.8)                 | 0                           | 0                      |
| Low-flow oxygen           | <b>3</b> | 1(33.3)                                                | 4(21.1)                 | 6(12.5)                     | 0                      |
| Ambient air               | <b>2</b> | 0                                                      | 0                       | 0                           | 0                      |
| Discharged                | <b>1</b> | 1(33.3)                                                | 7(36.8)                 | 42(87.5)                    | 3(100.0)               |
| <b>Improvement</b>        |          | <b>2(66.7)</b>                                         | <b>7(36.8)</b>          | <b>42(87.5)</b>             | <b>3(100.0)</b>        |

↑  
Category on ordinal scale

**C**

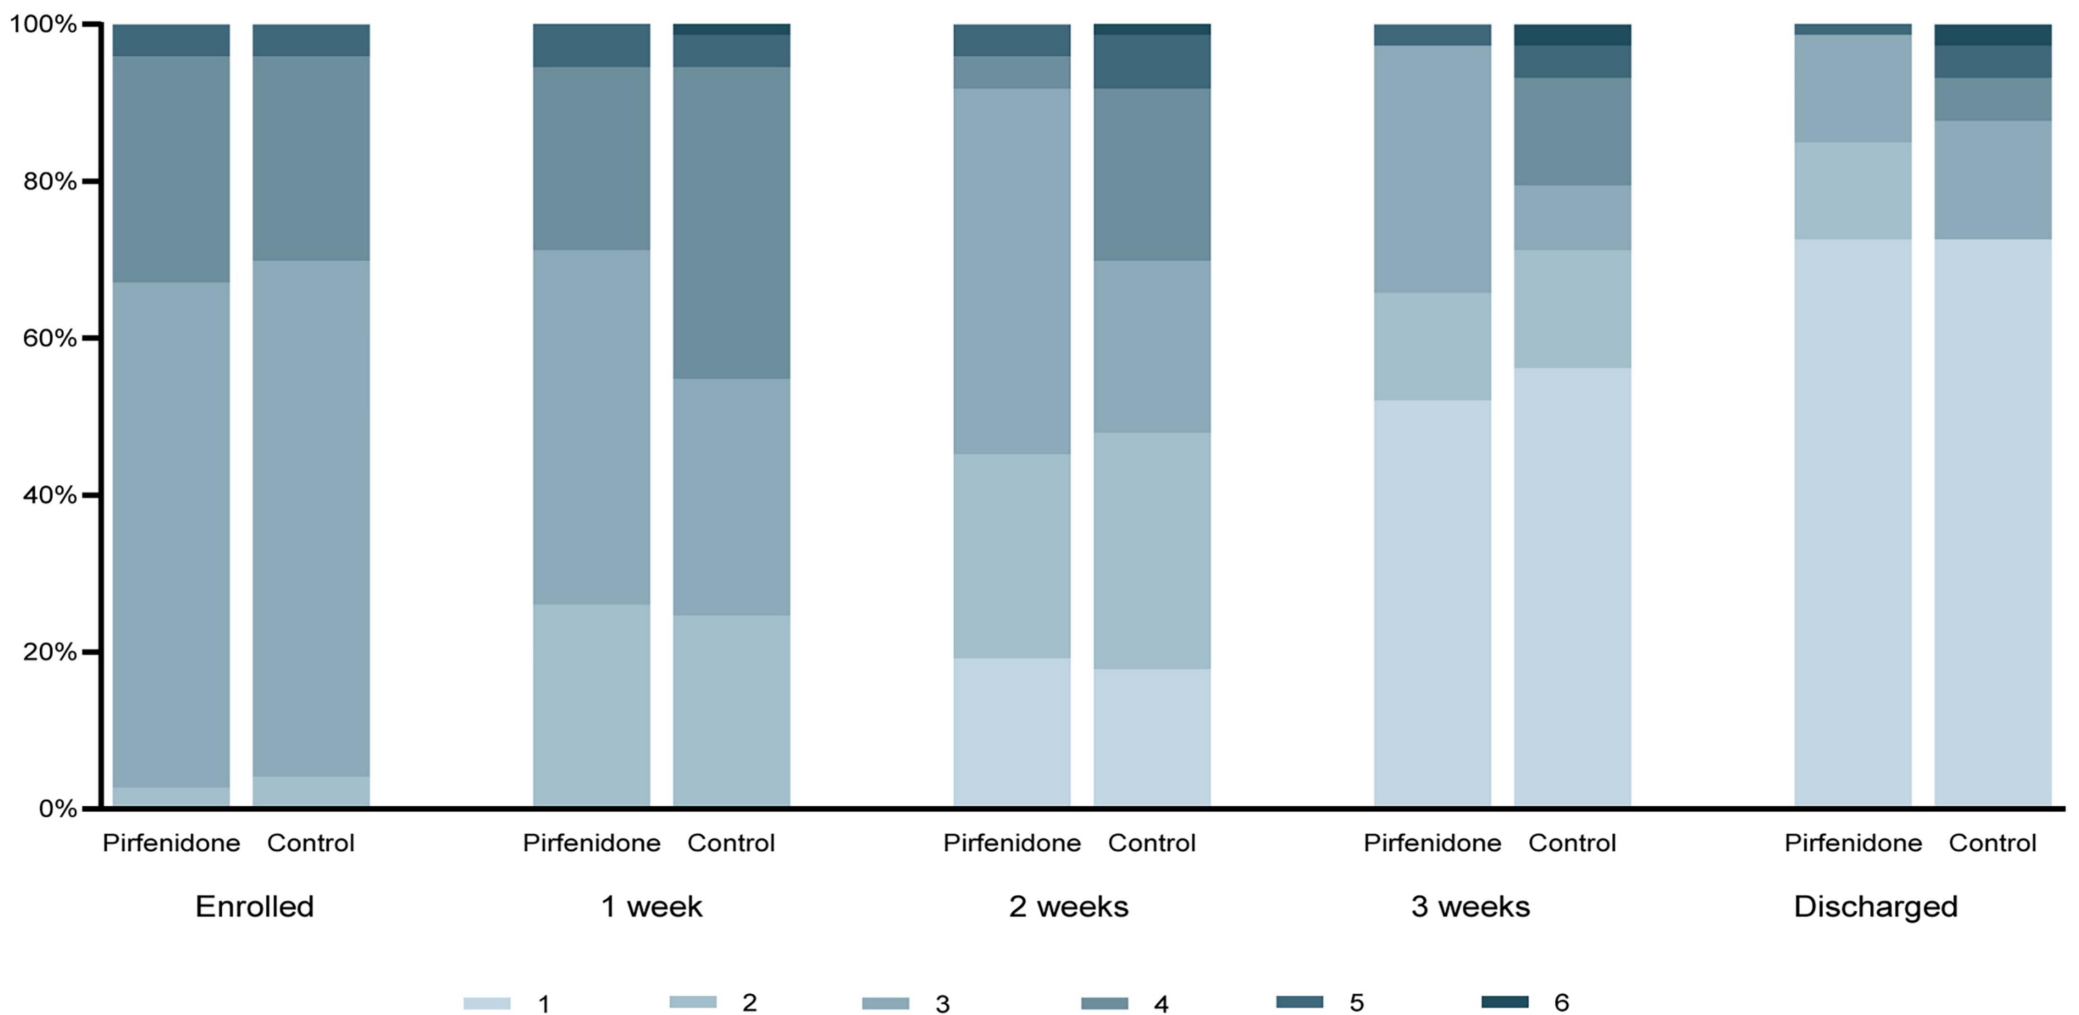

Supplement: cm9-135-368-s005.pdf [file cm9-135-368-s005.pdf]
