# Supplementary figures and images for: A trial of pirfenidone in hospitalized adult patients with severe coronavirus disease 2019
Source: PubMed Central journal article supplement — Chin Med J (Engl). 2021 Dec 1;135(3):368–70. doi: 10.1097/CM9.0000000000001614 (PMC8812696; doi:10.1097/cm9.0000000000001614), 2021-12-01

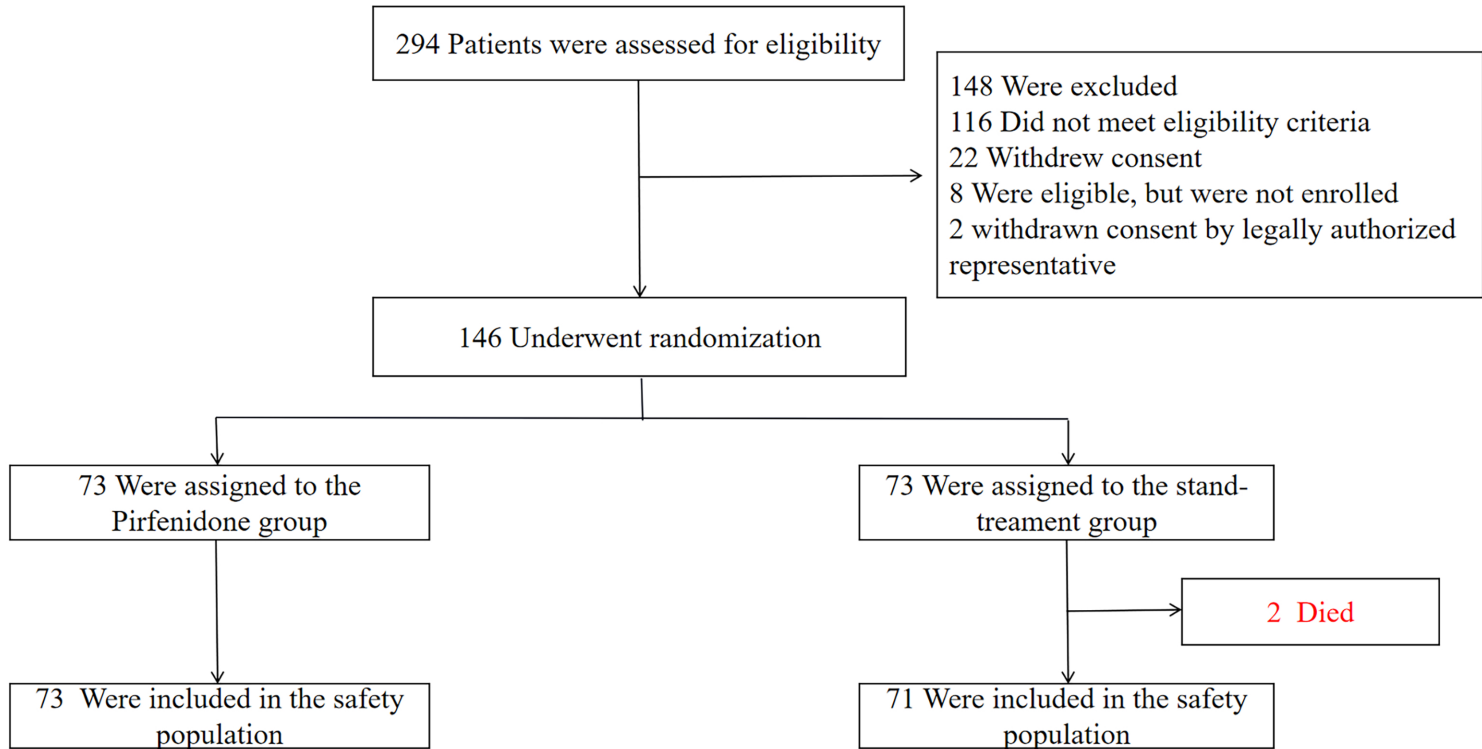

Supplement: cm9-135-368-s002.pdf [file cm9-135-368-s002.pdf]

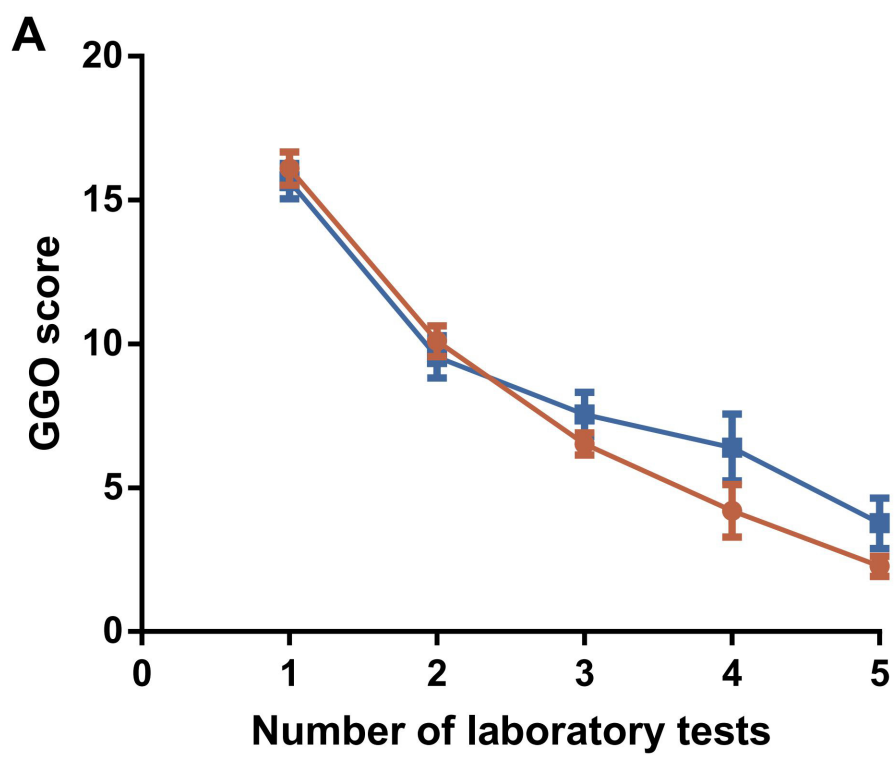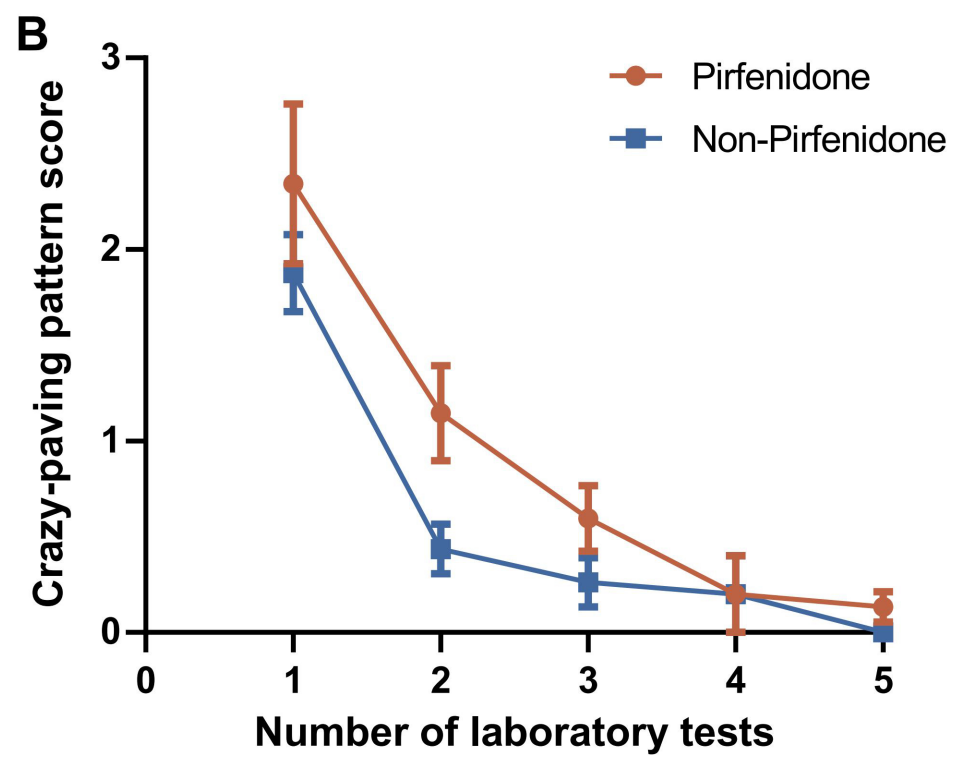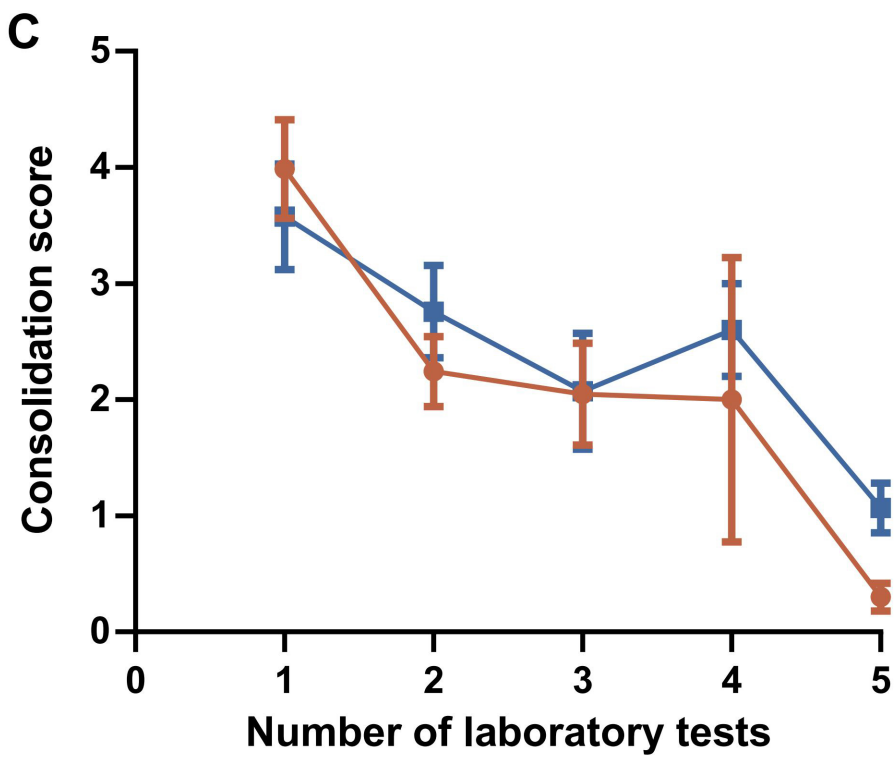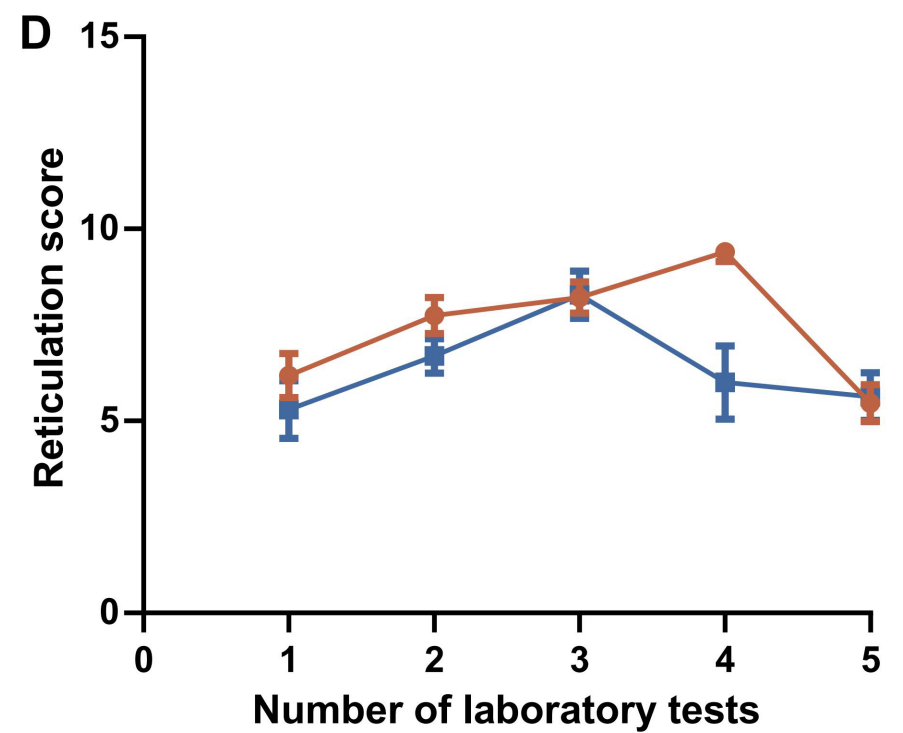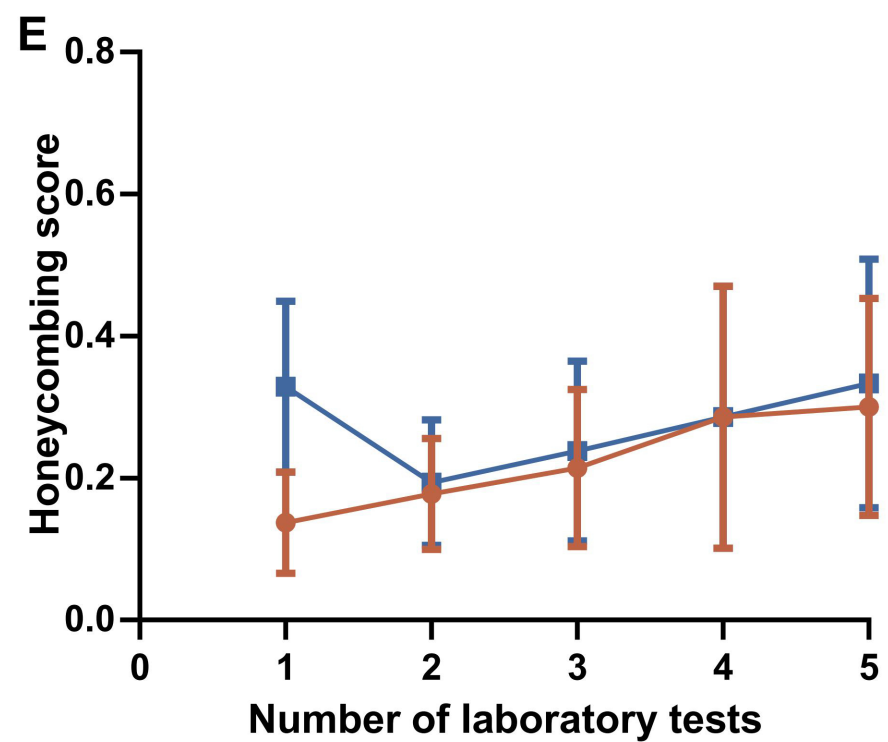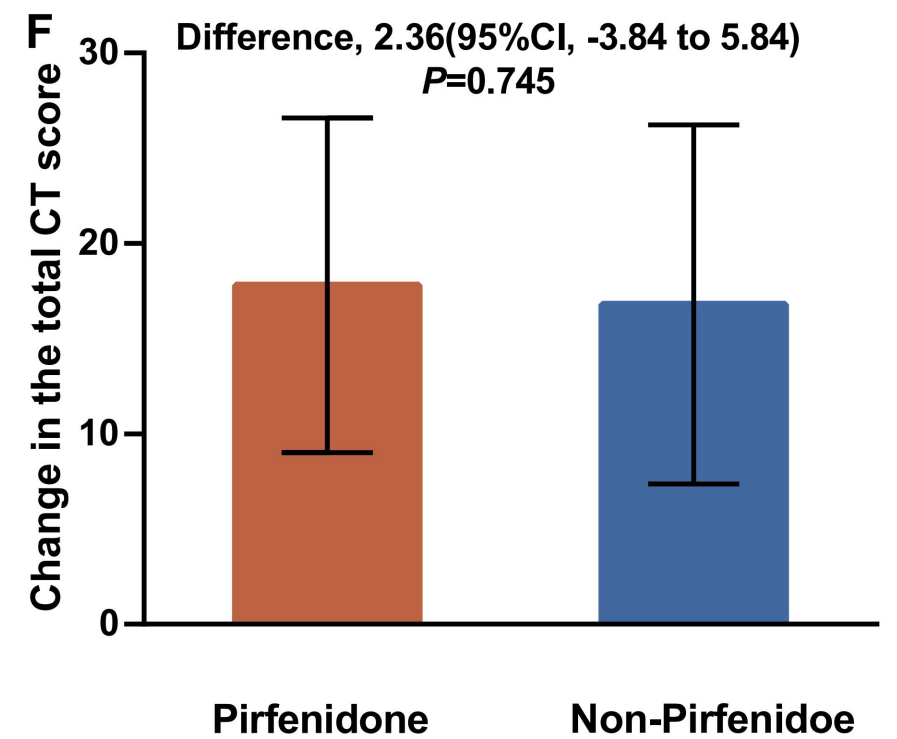

Supplement: cm9-135-368-s004.pdf [file cm9-135-368-s004.pdf]
